# Supplementary material for: Prominent and Persistent Extraneural Infection in Human PrP Transgenic Mice Infected with Variant CJD
Source: PLOS journal article supplement (doi:10.1371/journal.pone.0001419), 2008-01-08
Supplement: S3 (10.1371/journal.pone.0001419.s003) [file journal.pone.0001419.s003]

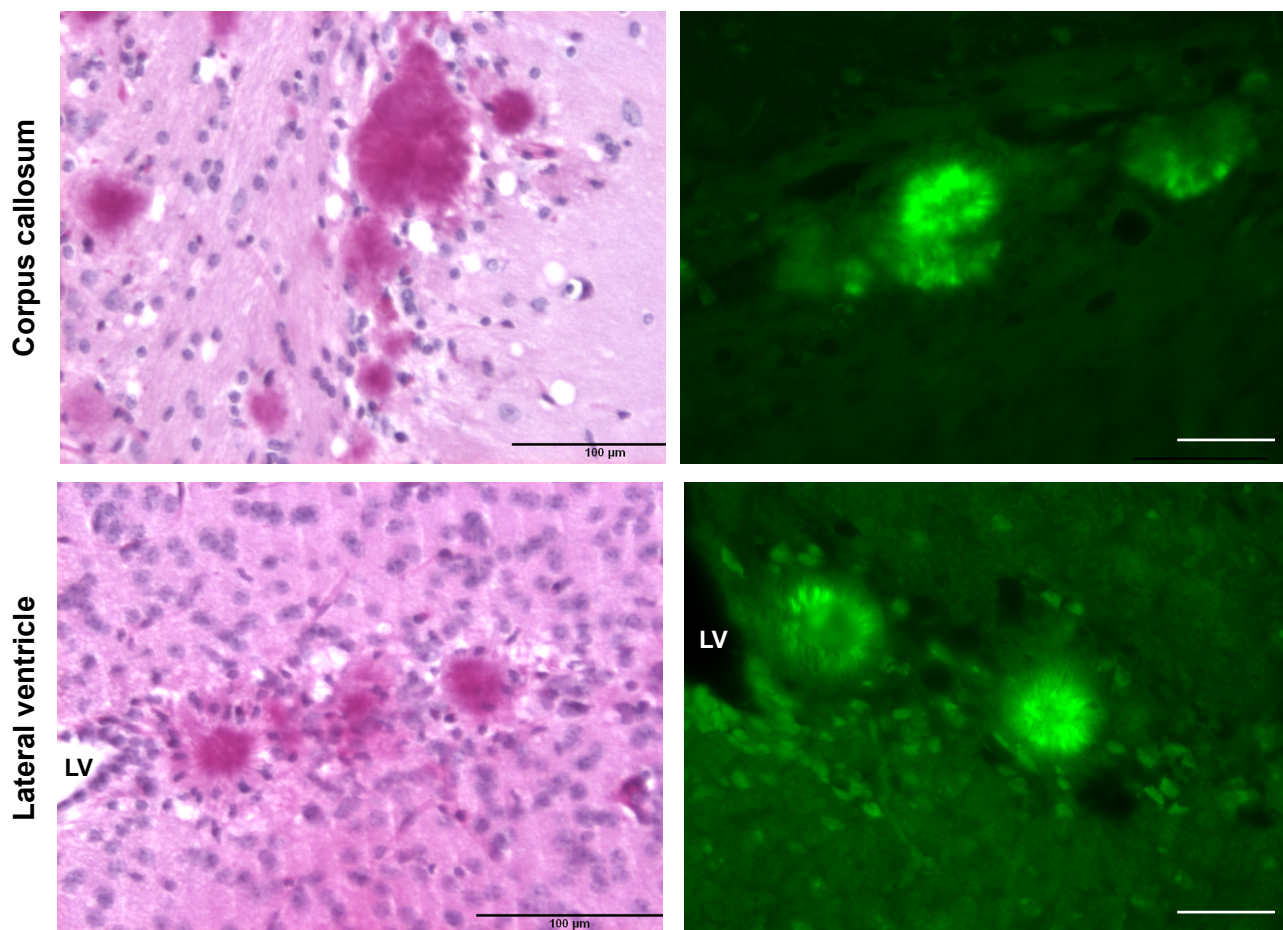

**Figure S3. Periodic acid-Schiff (left panel) and thioflavin-S staining (right panel) of fixed coronal brain sections of mice infected with *late* brain.**

Sections were stained at the level of the corpus callosum or the lateral ventricle (LV). Note the typical aspect of the plaques, arranged in peripheral radiating spicules. Scale bars = 100  $\mu$ m.
