# Supplementary material for: Prominent and Persistent Extraneural Infection in Human PrP Transgenic Mice Infected with Variant CJD
Source: PLOS journal article supplement (doi:10.1371/journal.pone.0001419), 2008-01-08
Supplement: S4 (10.1371/journal.pone.0001419.s004) [file journal.pone.0001419.s004]

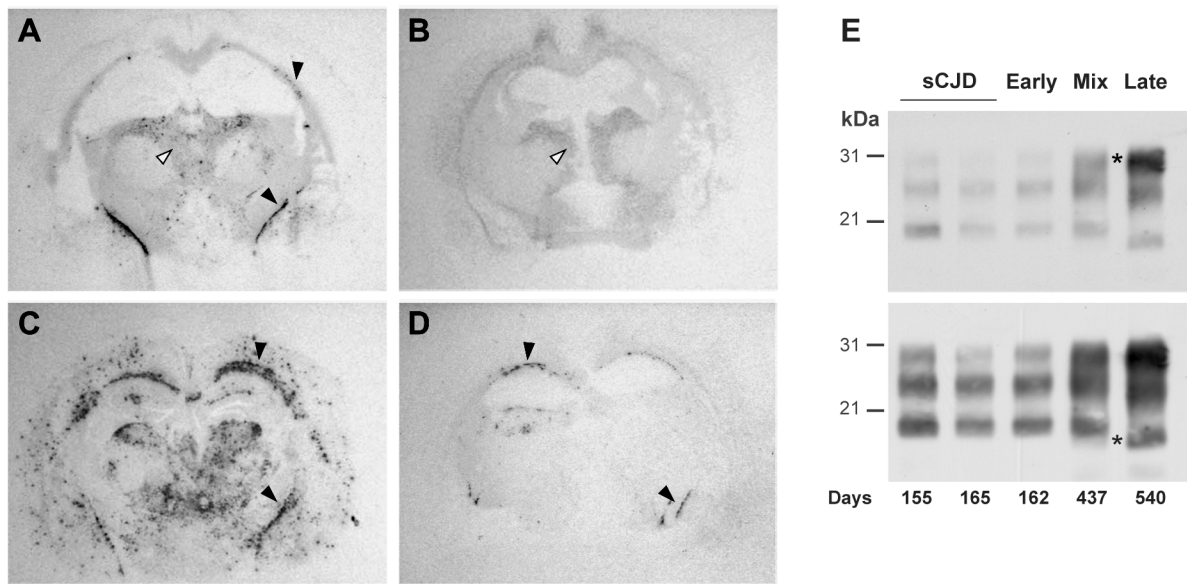

**Figure S4. Analysis of a mouse infected with vCJD case no.4 and showing a mixed PrP<sup>res</sup> profile.**

(A) Histoblot of brain sections of a diseased mouse (437 days pi), showing both diffuse (white arrowheads) and granular (black arrowheads) PrP<sup>res</sup> deposits. The distribution suggests a mixture of PrP<sup>sCJD</sup> and PrP<sup>vCJD</sup> when compared to mice infected with sCJD (B) or with vCJD (C: terminal stage; D: culled at 300 days pi). The corresponding immunoblot is shown in E (lane 4, 'mix'), in comparison to sCJD, early and late brains. Note the enrichment in diglycosylated PrP<sup>res</sup> species and the apparition of a faster migrating unglycosylated band (stars) on a more exposed gel bottom. PrP<sup>res</sup> was extracted from brain material harvested after slicing of the sections used for histoblotting.
