# Supplementary material for: Prominent and Persistent Extraneural Infection in Human PrP Transgenic Mice Infected with Variant CJD
Source: PLOS journal article supplement (doi:10.1371/journal.pone.0001419), 2008-01-08
Supplement: S5 (10.1371/journal.pone.0001419.s005) [file journal.pone.0001419.s005]

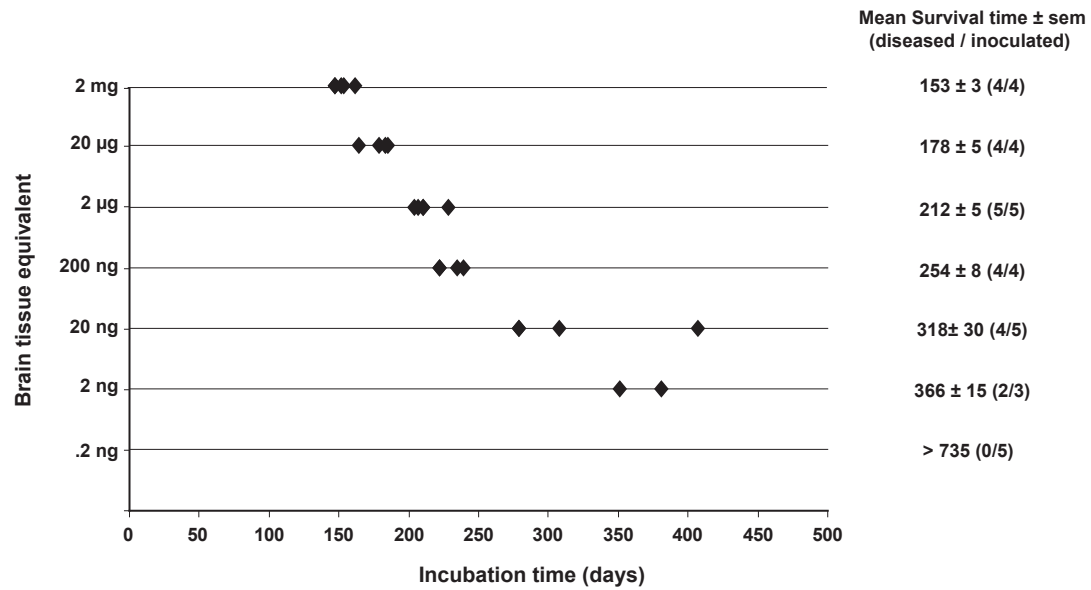

**Figure S5. End point titration of sCJD infectivity in tg650 mice.**

Brain homogenate from tg650 mice infected with sCJD brain was serially diluted and inoculated intracerebrally. The corresponding amounts of brain equivalent material, the mean survival time (days  $\pm$  sem) and the number of diseased/inoculated mice are indicated. The diseased mice were positive for brain PrP<sup>res</sup>.
